# Supplementary material for: Improved optical flow velocity analysis in SO 2 camera images of volcanic plumes – implications for emission-rate retrievals investigated at Mt Etna, Italy and Guallatiri, Chile
Source: Copernicus journal article supplement (doi:10.5194/amt-11-781-2018), 2018-02-08
Supplement: Supplementary file 1 [file amt-11-781-2018-supplement.zip]

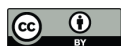

## *Supplement of*

# **Improved optical flow velocity analysis in SO<sub>2</sub> camera images of volcanic plumes – implications for emission-rate retrievals investigated at Mt Etna, Italy and Guallatiri, Chile**

**Jonas Gliß et al.**

*Correspondence to:* Jonas Gliß (jg@nilu.no)

- amt-11-781-2018-supplement-title-page.pdf
- supplemental\_video\_1\_etna\_emission\_rate.mp4
- supplemental\_video\_2\_guallatiri\_emission\_rate.mp4

The copyright of individual parts of the supplement might differ from the CC BY 4.0 License.
